# Supplementary material for: Insecticide tolerance shapes performance responses to multiple stressors in a crop pest
Source: Research Square preprint supplement (doi:10.21203/rs.3.rs-6156635/v1), 2025-03-07
Supplement: Supplementary file 1 [file d3a58da7b39d7e67d9fa78c2.xlsx]

## Sheet: Table S1.1
Table S1.1 Summary statistics for each phenotypic metric in the study.
Colony A: Summary Statistics
	Selected				Unselected
Mobility	Treatment	n	Mean	SE	Treatment	n	Mean	SE
	Control	49	26.9	1.2	Control	50	23.2	0.9
	Insecticide	48	22.6	0.8	Insecticide	47	21.1	0.7
	High Temperature	47	16.1	0.8	High Temperature	50	16	0.8
	Combined	46	11.1	0.7	Combined	46	15.3	0.9
Herbivory	Treatment	n	Mean	SE	Treatment	n	Mean	SE
	Control	47	0.056	0.008	Control	49	0.074	0.01
	Insecticide	48	0.018	0.004	Insecticide	47	0.056	0.011
	High Temperature	47	0.031	0.007	High Temperature	48	0.052	0.009
	Combined	47	0.013	0.005	Combined	42	0.049	0.011
Development Time	Treatment	n	Mean	SE	Treatment	n	Mean	SE
	Control	32	20.7	0.6	Control	41	19.1	0.6
	Insecticide	20	19.7	0.4	Insecticide	33	19.5	0.4
	High Temperature	39	20.8	0.7	High Temperature	34	19.2	0.4
	Combined	14	21.6	1.1	Combined	32	19.5	0.4
Survival to Adult Stage	Treatment	n	Mean	SE	Treatment	n	Mean	SE
	Control	47	0.7	0.067	Control	50	0.8	0.057
	Insecticide	44	0.68	0.085	Insecticide	31	0.73	0.068
	High Temperature	49	0.71	0.072	High Temperature	41	0.71	0.065
	Combined	39	0.48	0.093	Combined	30	0.85	0.059
Female Clutch Size	Treatment	n	Mean	SE	Treatment	n	Mean	SE
	Control	13	23.9	2.4	Control	16	26.1	2.4
	Insecticide	6	21.2	3.8	Insecticide	12	26.1	2.8
	High Temperature	6	24.1	3.3	High Temperature	7	24.5	4.2
	Combined	4	27.4	6.1	Combined	15	26.5	1.9
Female Percent Hatching	Treatment	n	Mean	SE	Treatment	n	Mean	SE
	Control	13	0.79	0.03	Control	16	0.78	0.05
	Insecticide	6	0.69	0.07	Insecticide	12	0.7	0.05
	High Temperature	6	0.77	0.04	High Temperature	7	0.86	0.04
	Combined	4	0.74	0.13	Combined	15	0.74	0.03

## Sheet: Table S2.1
Table S2.1 Tukey's HSD results for each phenotypic metric in the study.
Measurement	Selection			Insecticide			Temp			Selection*Insecticide			Selection*Temp			Insecticide*Temp			Selection*Insecticide*Temp
Mobility	F-value	Df	P-value	F-value	Df	P-value	F-value	Df	P-value	F-value	Df	P-value	F-value	Df	P-value	F-value	Df	P-value	F-value	Df	P-value
	0.4578	371	0.499075	24.5811	371	< 0.001	208.505	371	< 0.001	6.9669	371	< 0.01	14.0123	371	< 0.001	0.1261	371	0.722743	0.7209	371	0.396339
Herbivory	Chisq	Df	P-value	Chisq	Df	P-value	Chisq	Df	P-value	Chisq	Df	P-value	Chisq	Df	P-value	Chisq	Df	P-value	Chisq	Df	P-value
Continuous model	4.3655	1	<0.05	12.4172	1	<0.0001	10.678	1	<0.0001	7.9086	1	<0.001	0.1803	1	0.6711	2.9589	1	0.085477	0.31189	1	0.5722
Zero-inflated model	10.6319	1	<0.001	8.1342	1	<0.001	5.6588	1	<0.05	0.004	1	0.949396	0.1301	1	0.718365	0.0935	1	0.759126	0.8124	1	0.367399
Development Time	F-value	Df	P-value	F-value	Df	P-value	F-value	Df	P-value	F-value	Df	P-value	F-value	Df	P-value	F-value	Df	P-value	F-value	Df	P-value
	13.2426	1, 224	< 0.001	0.3909	1, 225	0.536135	0.9002	1, 223	0.343742	0.1968	1, 224	0.657714	1.0425	1, 223	0.308347	0.6231	1, 223	0.430739	0.7632	1, 223	0.383227
Survival to Adult Stage	Estimate	z-value	P-value	Estimate	z-value	P-value	Estimate	z-value	P-value	Estimate	z-value	P-value	Estimate	z-value	P-value	Estimate	z-value	P-value	Estimate	z-value	P-value
	0.33703	2.627	< 0.001	0.10403	0.808	0.419255	0.07839	0.613	0.539926	-0.18792	-1.47	0.141552	-0.14039	-1.098	0.272003	0.03864	0.302	0.762373	0.25831	2.02	<0.05
Female Clutch Size	F-value	Df	P-value	F-value	Df	P-value	F-value	Df	P-value	F-value	Df	P-value	F-value	Df	P-value	F-value	Df	P-value	F-value	Df	P-value
	0.9336	1, 66	0.3339	0.7639	1, 67	0.3821	0.6724	1, 69	0.4122	0.6235	1, 70	0.4297	0.4847	1, 67	0.4863	0.8542	1, 67	0.3554	0.5145	1, 69	0.4732
Female Percent Hatching	Estimate	t-value	P-value	Estimate	t-value	P-value	Estimate	t-value	P-value	Estimate	t-value	P-value	Estimate	t-value	P-value	Estimate	t-value	P-value	Estimate	t-value	P-value
	0.042	0.524	0.602	0.069	0.842	0.403	0.0015	0.565	0.574	0.0492	0.601	0.55	-0.00173	-0.647	0.52	-0.00088	-0.328	0.744	-0.00189	-0.705	0.483
